# Supplementary material
Source: ML conference proceedings conference paper supplement (https://openreview.net/forum?id=Dt71xKyabn)
Supplement: supplementary_material [file attachment]

## 594 A Additional Proofs on Stability and Expressivity

### 595 A.1 Stability Proofs

**Edge Filtrations versus Vertex Filtrations** Our results are structured to address filtrations built by a function on the *edges* of a graph  $G = (V, E)$ ,  $g: E \rightarrow \mathbb{R}$ . This matches our notions of discrete curvature, which are also defined edge-wise.  $g$  gives an explicit ordering on  $E$  and thus an induced ordering on  $V$  given by:

$$v \leq v' \iff \sum_{e \in E_v} g(e) \leq \sum_{e' \in E_{v'}} g(e')$$

where  $E_x$  is the set of edges incident to  $x \in V$ . However, one can also define a filtration over *vertices* with a scalar valued function  $f: V \rightarrow \mathbb{R}$ , and induce an ordering on edges.  $f$  can also attain a only finite number of values, call them  $b_1, b_2, \dots$  on the graph. Thus we can also compute a filtration  $\emptyset \subseteq G_0 \subseteq G_1 \dots \subseteq G_{k-1} \subseteq G_k = G$ , where each  $G_i := (V_i, E_i)$ , with  $V_i := \{v \in V \mid f(v) \leq b_i\}$  and  $E_i := \{e \in E \mid \max_{v \in e} f(v) \leq b_i\}$ . Similarly,  $f$  gives an explicit ordering on  $V$ , and induces an ordering on  $E$ , given by:

$$e \leq e' \iff \max_{v \in e} f(v) \leq \max_{v' \in e'} f(v')$$

596 The key idea here is that *either choice gives rise to an ordering of both edges, and vertices* that are  
597 used to calculate persistent homology of the graph. This means that the arguments for Theorem [1](#)  
598 and Theorem [5](#) also bound the bottle-neck distance for persistence diagrams generated using vertex  
599 filtrations.

600 **Theorem 1.** *Given graphs  $F = (V_F, E_F)$  and  $G = (V_G, E_G)$  with filtration functions  $f, g$ , and  
601 corresponding persistence diagrams  $D_f, D_g$ , we have  $d_B(D_f, D_g) \leq \max\{\text{dis}(f, g), \text{dis}(g, f)\}$ ,  
602 where  $\text{dis}(f, g) := |\max_{x \in E_F} f(x) - \min_{y \in E_G} g(y)|$  and vice versa for  $\text{dis}(g, f)$ .*

603 *Proof.* Considering the calculation of persistence diagrams based on scalar-valued filtrations func-  
604 tions, every point in the persistence diagram  $D_f$  can be written as a tuple of the form  $(f(e_F), f(e'_F))$ ,  
605 with  $e_F, e'_F \in E_F$ ; the same applies for  $D_g$ . The inner distance between such tuples that occur in  
606 the bottleneck distance calculation can thus be written as

$$\|(f(e_F), f(e'_F)) - (g(e_G), g(e'_G))\|_\infty. \quad (6)$$

607 The maximum distance that can be achieved using this expression is determined by the maximum  
608 variation of the functions, expressed via  $\text{dis}(f, g)$  and  $\text{dis}(g, f)$ , respectively.  $\square$

609 **Graph perturbations.** Here we explicitly specify a common framework used in the proofs for sta-  
610 bility of curvature functions. As mentioned in the main text, we consider perturbations to *unweighted*,  
611 *connected* graphs  $G = (V, E)$ , with  $|V| = n$  and  $|E| = m$ . In the case of *edge addition*, let  $i^*$  and  $j^*$   
612 be arbitrary vertices that we wish to connect with a *new* edge, forming our new graph  $G' = (V, E')$   
613 where  $E' = E \cup (i^*, j^*)$  such that  $|E'| = m + 1$ . For *edge deletion*, we similarly let  $(i^*, j^*) \in E$  be  
614 the edge we delete such that  $E' \subset E$  and  $|E'| = m - 1$ . Moreover, we only consider edges  $(i^*, j^*)$   
615 that leave  $G'$  connected.

#### 616 A.1.1 Forman–Ricci Curvature

617 **Theorem 2.** *If  $G'$  is the graph generated by **edge addition**, then the updated Forman curvature  $\kappa'_{FR}$   
618 for pre-existing edges  $(i, j) \in E$  can be bounded by  $\kappa_{FR}(i, j) - 1 \leq \kappa'_{FR}(i, j) \leq \kappa_{FR}(i, j) + 2$ . If  
619  $G'$  is the graph generated by **edge deletion**, then the updated Forman curvature  $\kappa'_{FR}$  for pre-existing  
620 edges  $(i, j) \in E$  can be bounded by  $\kappa_{FR}(i, j) - 2 \leq \kappa'_{FR}(i, j) \leq \kappa_{FR}(i, j) + 1$ .*

621 *Proof.* We first handle the case of **edge addition**. By definition  $\kappa_{FR}(i, j)$  depends *only* on the  
622 degrees of the source and target  $(i, j) \in E$  and the number of triangles formed using  $(i, j)$ ,  $|\#_{\Delta_{ij}}| =$   
623  $|N(i) \cup N(j)|$ , where  $N(i), N(j)$  are the set of neighbouring nodes for  $i, j$  respectively. This is a local  
624 computation— all relevant information can be computed in the subgraph generated by  $N(i) \cup N(j)$ .  
625 Thus, in order to understand stability of  $\kappa_{FR}$ , we need to understand how  $N(i)$  and  $N(j)$  change  
626 under graph perturbations. For our new graph  $G'$ , the only affected edges lie in the set:

$$E_{ij} := \{(u, v) \in E \mid u, v \in N(i) \cup N(j)\}$$

For the new edge  $(i^*, j^*)$ , we can directly compute  $\kappa_{\text{FR}}(i^*, j^*)$  based on the original structure of the graph. However, in terms of stability we are interested in the member of  $E_{ij}$ , which can be split into two cases: one of the nodes is  $i^*$  or  $j^*$  or neither is. *Case 1:* WLOG assume the edge is of the form  $(i^*, v) \in E_{ij}$ . Clearly,  $d'_i = d_i + 1$ . As for  $|\#'_{\Delta_{iv}}|$ , this can maximally be increased by 1 in the case that  $x \in S(i) \cap S(j)$ , else the triangle count stays the same. *Case 2:* consider  $(u, v) \in E_{ij}$  where  $u, v \in V \setminus \{i^*, j^*\}$ . In this case, there is no change to the degree nor the number  $|\#'_{\Delta_{uv}}|$ . Clearly then, if  $(i^*, j^*)$  forms a new triangle, our curvature can increase by 2, and if no triangle is formed the curvature can decrease by 1 in response to the increased degree. Thus we can bound  $\kappa'_{\text{FR}}(i, j) := 4 - d'_i - d'_j + 3|\#'_{\Delta_{ij}}|$  as follows:

$$\kappa_{\text{FR}}(i, j) - 1 \leq \kappa'_{\text{FR}}(i, j) \leq \kappa_{\text{FR}}(i, j) + 2$$

627 The case of **edge deletion** can be handled similarly. Again, we need only consider the edges in  $E_{ij}$ , as  
 628 defined in the proof above, and can make the same case argument. *Case 1:* WLOG assume the edge  
 629 is of the form  $(i^*, v) \in E_{ij}$ . Clearly,  $d'_i = d_i - 1$ . As for  $|\#'_{\Delta_{iv}}|$ , this can maximally be decreased  
 630 by 1. *Case 2:* Degree and number of triangles do not change in response to the perturbation. Thus the  
 631 following bounds hold for  $\kappa'_{\text{FR}}$ :

$$\kappa_{\text{FR}}(i, j) - 2 \leq \kappa'_{\text{FR}}(i, j) \leq \kappa_{\text{FR}}(i, j) + 1$$

632

□

### 633 A.1.2 Ollivier–Ricci Curvature

634 The definition of  $\kappa_{\text{OR}}$  establishes a relationship between the graph metric  $d_G$ , the Wasserstein distance  
 635  $W_1$ , the probability distributions  $\mu_i, \mu_j$  at nodes  $i, j$  and the curvature. Given that we are considering  
 636 unweighted, and connected graphs we know that  $(V, d_G)$  is a well-defined metric space and therefore  
 637  $W_1$  (as defined in [54]) defines the  $L_1$  transportation distance between two probability measures  
 638  $\mu_i, \mu_j$  with respect to the metric  $d_G$ . This is relevant for a much larger class of graph metrics than just  
 639 the standard choice of the shortest path distance. We use results from [54] and the metric properties  
 640 of  $W_1$  and  $d_G$  on graphs to bound the potential changes in  $\kappa_{\text{OR}}$  following an edge perturbation.

641 **Lemma 1.** Consider the triple  $\mathcal{G} = (G, d_G, \mu)$ . Let  $\delta_i$  denote the Dirac measure at node  $i$  and  $J(i)$   
 642  $:= W_1(\delta_i, \mu_i)$  the corresponding jump probability in the graph  $G$ . The Ollivier–Ricci curvature  
 643  $\kappa_{\text{OR}}(i, j)$  satisfies the following Bonnet–Myers inspired upper bound:

$$\kappa_{\text{OR}}(i, j) \leq \frac{J(i) + J(j)}{d_G(i, j)} \quad (7)$$

*Proof.* Rearranging the original definition for OR curvature gives:

$$W_1(\mu_i, \mu_j) = d_G(i, j)(1 - \kappa_{\text{OR}}(i, j))$$

644 By definition of the  $W_1$ , we have  $d_G(i, j) = W_1(\delta_i, \delta_j)$ . Using this and the fact that  $W_1$  satisfies the  
 645 triangle inequality property, we can construct the desired upper bound on  $\kappa_{\text{OR}}$ :

$$\begin{aligned} d_G(i, j) &\leq W_1(\delta_i, \mu_i) + W_1(\mu_i, \mu_j) + W_1(\delta_j, \mu_j) \\ d_G(i, j) &\leq J(i) + d_G(i, j)(1 - \kappa_{\text{OR}}(i, j)) + J(j) \\ d_G(i, j)(1 - (1 - \kappa_{\text{OR}}(i, j))) &\leq J(i) + J(j) \\ \kappa_{\text{OR}}(i, j) &\leq \frac{J(i) + J(j)}{d_G(i, j)} \end{aligned}$$

646

□

647 **Theorem 3.** Given a perturbation (either **edge addition** or **edge deletion**) producing  $\mathcal{G}'$ , the Ollivier–  
 648 Ricci  $\kappa'_{\text{OR}}(i, j)$  of a pair  $(i, j)$  can be bounded via

$$1 - \frac{1}{d_{G'}(i, j)} [2W'_{\max} + W'_1(\mu_i, \mu_j)] \leq \kappa'_{\text{OR}}(i, j) \leq \frac{J'(i) + J'(j)}{d_{G'}(i, j)}, \quad (4)$$

649 where  $J'(v) := W'_1(\delta_v, \mu'_v)$  refers to the new jump probabilities and  $W'_{\max} := \max_{x \in V} W'_1(\mu_x, \mu'_x)$   
 650 denotes the maximal reaction to the perturbation (measured using the updated Wasserstein distance).

651 *Proof.* We first prove the *upper bound*. Given that  $G'$  is still connected, and both  $W'_1$  and  $d_{G'}$  still  
652 satisfy the metric axioms, this result follows directly from Lemma Lemma 1. For proving the *lower*  
653 *bound*, recall from Section 3.1 that  $\mathcal{G}' = (G', d_{G'}, \mu')$  specifies the behaviour of the new graph metric  
654  $d_{G'}$  and the updated probability measure  $\mu'$  in response to the perturbation. Moreover, this  
655 defines a new Wasserstein distance  $W'_1$  and we will show that the maximum reaction (as evaluated  
656 by  $W'_1$ ) to the perturbation  $W'_{\max} := \max_{x \in V} W'_1(\mu'_x, \mu_x)$  can be used to express a general lower  
657 bound for OR curvature in the event of a perturbation. As per Eq. (2), we can define our curvature  
658 following the perturbation as:

$$\kappa'_{\text{OR}}(i, j) = 1 - \frac{1}{d_{G'}(i, j)} W'_1(\mu'_i, \mu'_j) \quad (8)$$

659 Once again, we can make use of the metric properties of  $W'_1$ , to establish the lower bound as

$$\begin{aligned} \kappa'_{\text{OR}}(i, j) &\geq 1 - \frac{1}{d_{G'}(i, j)} [W'_1(\mu_i, \mu'_i) + W'_1(\mu_j, \mu'_j) + W'_1(\mu_i, \mu_j)] \\ &\geq \frac{1}{d_{G'}(i, j)} [2W'_{\max} + W'_1(\mu_i, \mu_j)]. \end{aligned}$$

660

□

### 661 A.1.3 Resistance Curvature

662 The resistance distance, intuitively, measures how well connected two nodes are in a graph. It is  
663 defined in [19] as:

$$R_{ij} := (\mathbf{e}_i - \mathbf{e}_j)^T Q^\dagger (\mathbf{e}_i - \mathbf{e}_j) \quad (9)$$

664 Here  $Q$  is the normalized laplacian (weighted degrees on the diagonal, see [19]),  $Q^\dagger$  the Moore-  
665 Penrose inverse, and  $\mathbf{e}_i$  is  $i^{\text{th}}$  unit vector. This is the main feature that will be studied to understand the  
666 stability of the curvature measure, and can be computed for any two nodes in a connected component  
667 of a graph.

668 *A brief aside regarding the practice of inverting edge weights:* The common practice when computing  
669 effective resistance is to invert the edge weights of a graph in order to get a resistance. Given the  
670 spirit of resistance from circuit theory, we know that a high resistance should make it difficult for  
671 current to pass between nodes. Analogously when thinking about our graph as a markov chain, this  
672 would correspond to a low transition probability. So, if we think about our edge weights as coming  
673 from some kernel where higher similarity results in a higher edge weight, then we should definitely  
674 invert our edge weights to get to resistance. However, in the case that our edge weights represent the  
675 cost of travelling between nodes, then this is a suitable proxy for resistance in which case inverting  
676 the nodes is unnecessary. In order to achieve the theoretical properties of curvature with well known  
677 examples described in [19], we *do not* invert the edge weights in our experiments. Which means that  
678 the curvature itself interprets the edge weights themselves as a cost/resistance; I think is an important  
679 point to specify especially given the similarity to markov chains and the borrowed terminology from  
680 circuit theory.

681 Recalling the equations for node resistance curvature and resistance curvature, i.e. Eq. (3), it becomes  
682 clear that the main task is to understand how the resistance distance changes in response to pertur-  
683 bations. The results below from [45], are crucial for our proofs. Let  $C(i, j)$  be the commute time  
684 between nodes  $i, j \in V$ . It is important to note that these results depend on the *normalized Laplacian*,  
685 defined in [45] as  $N = D^{\frac{1}{2}} A D^{\frac{1}{2}}$ , with eigenvalues  $\lambda_i$ , ordered such that  $\lambda_1 \geq \lambda_2 \geq \dots$ . Here,  $D$  is  
686 the diagonal matrix with inverse degrees and  $A$  the adjacency matrix. Also, as is consistent with the  
687 rest of the paper, assume our graph has  $n$  nodes and  $m$  edges, and  $d_i$  is the degree at node  $i \in V$ .

688 **Proposition 1.** *For a graph  $G$ , let  $N = D^{\frac{1}{2}} A D^{\frac{1}{2}}$  be the normalized Laplacian with eigen values*  
689  $\lambda_1 \geq \lambda_2 \geq \dots \geq \lambda_n$ . *Then, the commute time in  $G$  between nodes  $i, j$  is subject to the following*  
690 *bounds:*

$$m \left( \frac{1}{d_s} + \frac{1}{d_t} \right) \leq C(i, j) \leq \frac{2m}{1 - \lambda_2} \left( \frac{1}{d_s} + \frac{1}{d_t} \right) \quad (10)$$

691 **Proposition 2.** *Consider the unweighted graph  $G$ , where each edge represents a unit resistance,*  
692 *i.e we consider each edge in the graph to be artificially weighted with value 1. Then the following*  
693 *equality holds for the commute time between nodes  $i, j$ :*

$$C(i, j) = 2mR_{ij} \quad (11)$$

694 **Proposition 3.** *If  $G'$  arises from a graph  $G$  by adding a new edge, then the commute time  $C'(i, j)$*   
 695 *between any two nodes in  $G'$  is bounded by:*

$$C'(i, j) \leq (1 + \frac{1}{m})C(i, j) \quad (12)$$

696 For proofs of these propositions, we refer the reader to [45]. These results create a direct connection  
 697 between commute times and resistance distance, and gives insight into how commute time reacts  
 698 under edge addition, and we use them directly to generate our bounds for resistance curvature.

699 **Theorem 4.** *If  $G'$  is the graph generated by **edge addition**, then  $\kappa'_R \geq \kappa_R$ , with the following bound:*

$$|\kappa'_R(i, j) - \kappa_R(i, j)| \leq \frac{\Delta_{add}(d_i + d_j)}{R_{ij} - \Delta_{add}}, \quad (5)$$

700 where  $\Delta_{add} := \max_{i, j \in V} (R_{ij} - \frac{1}{2}(\frac{1}{d_i+1} + \frac{1}{d_j+1}))$ .

701 *Proof.* Let  $R'_{ij}$  be the resistance distance in  $G'$ . Likewise, let  $C(i, j)$  be the commute distance in  
 702  $G$  between nodes  $i, j$  and  $C'(i, j)$  be the commute time in  $G'$ . Then [12] and [11] ensure that  $R'_{ij}$  is  
 703 bounded above, by the original resistance distance in  $G$ :

$$\begin{aligned} 2(m+1)R'_{ij} &\leq 2m(1 + \frac{1}{m})R_{ij} \\ R'_{ij} &\leq R_{ij} \end{aligned}$$

704 This follows our intuition of resistance distance very well: with the addition of an edge nodes can  
 705 only get more connected. [10] also gives a nice lower bound:

$$\begin{aligned} (m+1)(\frac{1}{d'_i} + \frac{1}{d'_j}) &\leq C'(i, j) \\ \frac{1}{2}(\frac{1}{d'_i} + \frac{1}{d'_j}) &\leq R'_{ij} \end{aligned}$$

706 In the case that we are adding a single edge, it is often the case that  $d'_x = d_x$ . However, the nodes that  
 707 are connected by the new edge,  $(i^*, j^*) \in E' \setminus E$ , increase such that  $d'_{i^*} = d_{i^*} + 1$  and  $d'_{j^*} = d_{j^*} + 1$ .  
 708 Thus, the following lower bound holds in general for  $R'_{ij}$  and we can remain agnostic to the precise  
 709 location of the new edge:

$$\frac{1}{2}(\frac{1}{d_i+1} + \frac{1}{d_j+1}) \leq R'_{ij} \leq R_{ij} \quad (13)$$

710 And likewise, after adding  $p$  edges:

$$\frac{1}{2}(\frac{1}{d_i+p} + \frac{1}{d_j+p}) \leq R_{ij}^p \leq R_{ij}$$

711 So the bounds of our 'perturbed' resistance distance  $R'_{ij}$  are determined by the initial network  
 712 structure ( $R_{ij}$ ) and the number connections each specific vertex has. Naturally, certain node pairs  
 713 will be more strongly affected by the addition of an edge. We can define the maximum reaction to  
 714 perturbation across pairs as follows:

$$\Delta_{add} := \max_{i, j \in V} \left( R_{ij} - \frac{1}{2}(\frac{1}{d_i+1} + \frac{1}{d_j+1}) \right) \quad (14)$$

715 This can be used to bound node resistance curvature. In an unweighted graph, we have

$$p_i = 1 - \frac{1}{2} \sum_{j \sim i} R_{ij}$$

$$p'_i = 1 - \frac{1}{2} \sum_{j \sim i} R'_{ij}$$

716 For  $G$  and  $G'$  respectively. Given that resistance can only increase,  $p_i$  is clearly an lower bound for  
 717  $p'_i$ . Certainly a lower bound occurs when when the resistance between each one of  $i$ 's neighbors  
 718 maximally decreases. Thus we get the following inequality:

$$p_i \leq p'_i \leq p_i + \frac{d_i}{2} \Delta_{add}$$

Finally this gives the desired bound on  $\kappa'_R$ :

$$\kappa_R(i, j) \leq \kappa'_R(i, j) \leq \kappa_R(i, j) + \frac{\Delta_{add}(d_i + d_j)}{R_{ij} - \Delta_{add}}$$

719

□

720 **Theorem 7.** If  $G'$  is the graph generated by **edge deletion**, then  $\kappa'_R \leq \kappa_R$ , bounded by:

$$|\kappa'_R(i, j) - \kappa_R(i, j)| \leq \frac{1}{R_{ij} + \Delta_{del}} \left[ \frac{2}{R_{ij}} (2R_{ij} + \Delta_{del})(p_i + p_j) - \Delta_{del}(d_i + d_j) \right],$$

721 where  $\Delta_{del} = \frac{2}{1-\lambda_2} - \min_{i,j \in V} (R_{ij})$  and  $\lambda_2$  is the second largest eigenvalue of  $N$ .

722 *Proof.* Now we can beg the question of how effective resistance changes when we remove an edge.  
 723 By inverting our initial argument in above proof of 4 we know that after removing an edge our  
 724 resistance distance can only increase. Formally,  $R_{ij} \leq R'_{ij}$ . For the upper bound, we can once again  
 725 make an argument using 10 this time relying on the other half of the inequality. Here we need to also  
 726 mention the normalized Laplacian  $N'$  for  $G'$ , with eigenvalues  $\lambda'_1 \geq \lambda'_2 \geq \dots \geq \lambda'_n$ .

$$C'(i, j) \leq \frac{2(m-1)}{1-\lambda'_2} \left( \frac{1}{d'_i} + \frac{1}{d'_j} \right)$$

$$R'_{ij} \leq \frac{1}{1-\lambda'_2} \left( \frac{1}{d'_i} + \frac{1}{d'_j} \right)$$

727 Again, we know that only the two unique vertices  $(i^*, j^*)$  that shared an edge will have affected  
 728 degrees, s.t  $d'_{i^*} = d_{i^*} - 1$  and  $d'_{j^*} = d_{j^*} - 1$ . Moreover, from 28, we know that  $\lambda_2 \geq \lambda'_2$ . So we  
 729 can bound the  $R'_{ij}$  as follows:

$$R_{ij} \leq R'_{ij} \leq \frac{2}{1-\lambda_2} \quad (15)$$

730 In fact, this applies to any number of edge deletions, as long as  $G'$  stays connected. Again, we can  
 731 define a maximum possible change in resistance distance across the graph:

$$\Delta_{del} = \max_{i,j \in V} \left( \frac{2}{1-\lambda_2} - R_{ij} \right) = \frac{2}{1-\lambda_2} - \min_{i,j \in V} (R_{ij}) \quad (16)$$

732 This leads to the following bounds on node and edge curvature, and completes the proof:

$$p_i - \frac{d_i}{2} \Delta_{del} \leq p'_i \leq p_i$$

$$(1-\lambda_2)[p_i + p_j - \frac{\Delta_{del}}{2}(d_i + d_j)] \leq \kappa'_R(i, j) \leq \kappa_R(i, j)$$

$$\kappa_R(i, j) - \frac{1}{R_{ij} + \Delta_{del}} \left[ \frac{2}{R_{ij}} (2R_{ij} + \Delta_{del})(p_i + p_j) - \Delta_{del}(d_i + d_j) \right] \leq \kappa'_R(i, j) \leq \kappa_R(i, j)$$

733

□

## 734 A.2 Expressivity Proofs

735 **Theorem 5.** *Given two graphs  $F = (V_F, E_F)$  and  $G = (V_G, E_G)$  with scalar-valued filtra-*  
736 *tion functions  $f, g$ , and their respective persistence diagrams  $D_f, D_g$ , we have  $d_B(D_f, D_g) \geq$*   
737  *$\inf_{\eta: E_F \rightarrow E_G} \sup_{x \in E_F} |f(x) - g(\eta(x))|$ , where  $\eta$  ranges over all maps from  $E_F$  to  $E_G$ .*

738 *Proof.* Considering the calculation of persistence diagrams based on scalar-valued filtrations func-  
739 tions, every point in the persistence diagram  $D_f$  can be written as a tuple of the form  $(f(e_F), f(e'_F))$ ,  
740 with  $e_F, e'_F \in E_F$ ; the same applies for  $D_g$ . The inner distance between such tuples that occur in  
741 the bottleneck distance calculation can thus be written as

$$\|(f(e_F), f(e'_F)) - (g(e_G), g(e'_G))\|_\infty, \quad (17)$$

742 which we can rewrite to  $\max_{C: E_F \rightarrow E_G} \{f(x) - g(C(x))\}$  for a general map  $C$  induced by the  
743 bijection of the bottleneck distance. Not every map is induced by a bijection, though. Hence, if  
744 we maximise over *arbitrary* maps between the edge sets, we are guaranteed to never exceed the  
745 bottleneck distance.  $\square$

## 746 B Additional Proofs for Distinguishing Strongly Regular Graphs

747 **Theorem 6** (Expressivity of curvature notions). *Both Forman–Ricci curvature and Resistance*  
748 *curvature cannot distinguish distance-regular graphs with the same intersection array, whereas*  
749 *Ollivier–Ricci curvature can distinguish the Rook and Shrikhande graphs, which are strongly-regular*  
750 *graphs with the same intersection array.*

751 *Proof.* We first show the part of the statement relating to the *Forman–Ricci curvature*. Given a  
752 distance-regular graph  $G$  with  $N$  vertices and intersection array  $\{b_0, b_1, \dots, b_{D-1}; c_1, c_2, \dots, c_D\}$ .  
753 Let  $i, j$  be adjacent nodes in  $G$ . For a regular graph, we have  $d_i = d_j = b_0$ , where  $b_0$  is a constant.  
754 The number of triangles between two adjacent nodes  $i$  and  $j$  in  $G$  is given by  $a_1 = b_0 - b_1 - c_1$  [18].  
755 The Forman curvature of  $i, j$  is thus

$$\kappa_{\text{FR}}(i, j) := 4 - 2b_0 + 3|b_0 - b_1 - c_1|. \quad (18)$$

756 Given two strongly-regular graphs with the same intersection array, i.e. the same values of  $b_0, b_1$  and  
757  $c_1$ , the Forman curvature yields the same value for all pairs of adjacent nodes and cannot distinguish  
758 them. For the *resistance curvature*, the claim follows as an immediate Corollary of Theorem A [6]  
759 and described in Koolen et al. [40]. Given the resistance between two nodes depends only on  
760 the intersection array and the number of nodes in the graph, then the resistance curvature cannot  
761 distinguish two strongly-regular graphs.

762 The expressivity of Ollivier–Ricci curvature is strictly better, and it turns out that there are graphs  
763 with the same intersection array that we can distinguish, namely the Rook graph and the Shrikhande  
764 graph. Both graphs have the same intersection array  $\{6, 3; 1, 2\}$  but differ in their first hop  
765 peripheral subgraphs [22]. It is known that 2-WL cannot distinguish these graphs. Ollivier–Ricci  
766 curvature, however, is sensitive to these differences in peripheral subgraphs with the edge curvatures  
767 for the Rook graph being:  $[0.2, 0.2, 0.33, 0.33, 0.33, 0.2, 0.33, 0.33, 0.33, 0.33, 0.33, 0.33, 0.33,$   
768  $0.33, 0.33, 0.2, 0.2, 0.33, 0.33, 0.33, 0.33, 0.33, 0.33, 0.33, 0.33, 0.33, 0.33, 0.2, 0.33,$   
769  $0.33, 0.33, 0.33, 0.33, 0.33, 0.33, 0.33, 0.33, 0.33, 0.33]$ , and for the Shrikhande graph they  
770 are  $[0, 0, 0.27, 0.27, 0.1, 0, 0.27, 0.27, 0.1, 0, 0.27, 0.1, 0.27, 0, 0.27, 0.1, 0.27, 0, 0.1, 0.27, 0.27,$   
771  $0.1, 0.27, 0.27, 0.17, 0.17, 0.17, 0.17, 0.17, 0.17, 0.17, 0.17, 0.17, 0.17, 0.17, 0.17, 0.17, 0.17, 0.17,$   
772  $0.17, 0.17, 0.17]$ , demonstrating that OR curvature can distinguish these graphs—*unlike Resistance*  
773 *curvature, Forman–Ricci curvature and the 2-WL test.*  $\square$

## 774 C Additional Stability Analysis

775 Given the bounds on curvature established in Section 3.1 we explore how curvature changes ex-  
776 perimentally by analysing edge perturbations on Erdős–Rényi graphs. In particular, we provide  
777 statistics that quantify the maximal change in curvature for random graphs with varying connectivity  
778 parameters in response to edge additions and deletions. The experiment fixes the number of nodes in  
779 the ER graphs ( $n = 100$ ), and generates a sample of 50 graphs for the selected values of  $p$ . For each

graph in the sample, we measure the curvature  $\kappa$  of all edges and calculate the standard deviation  $\sigma_\kappa$  of this distribution. We then perturb the original graph by edge addition/deletion and calculate the new curvature  $\kappa'$ . The following tables present the *worst case* deviations in curvature, which we define as  $\Delta\kappa = |\kappa - \kappa'|$ , in units of  $\sigma_\kappa$ ; in other words the maximal value of  $\Delta\kappa/\sigma_\kappa$  over all sample graphs and their edges.

| Curvature     | Edge Addition: Maximal Change ( $\downarrow$ ) in Curvature for ER Graphs ( $\Delta\kappa/\sigma_\kappa$ ) |         |         |         |         |         |         |         |         |
|---------------|------------------------------------------------------------------------------------------------------------|---------|---------|---------|---------|---------|---------|---------|---------|
|               | $p=0.1$                                                                                                    | $p=0.2$ | $p=0.3$ | $p=0.4$ | $p=0.5$ | $p=0.6$ | $p=0.7$ | $p=0.8$ | $p=0.9$ |
| $\kappa_{FR}$ | 0.582                                                                                                      | 0.419   | 0.334   | 0.296   | 0.253   | 0.246   | 0.232   | 0.25    | 0.315   |
| $\kappa_{OR}$ | 1.545                                                                                                      | 1.157   | 0.613   | 0.465   | 0.396   | 0.366   | 0.368   | 0.399   | 0.512   |
| $\kappa_R$    | 0.689                                                                                                      | 0.417   | 0.296   | 0.251   | 0.221   | 0.232   | 0.227   | 0.243   | 0.321   |

| Curvature     | Edge Deletion: Maximal Change ( $\downarrow$ ) in Curvature for ER Graphs ( $\Delta\kappa/\sigma_\kappa$ ) |         |         |         |         |         |         |         |         |
|---------------|------------------------------------------------------------------------------------------------------------|---------|---------|---------|---------|---------|---------|---------|---------|
|               | $p=0.1$                                                                                                    | $p=0.2$ | $p=0.3$ | $p=0.4$ | $p=0.5$ | $p=0.6$ | $p=0.7$ | $p=0.8$ | $p=0.9$ |
| $\kappa_{FR}$ | 0.609                                                                                                      | 0.408   | 0.334   | 0.291   | 0.255   | 0.239   | 0.245   | 0.243   | 0.319   |
| $\kappa_{OR}$ | 1.397                                                                                                      | 1.27    | 0.623   | 0.479   | 0.394   | 0.365   | 0.347   | 0.402   | 0.482   |
| $\kappa_R$    | 0.75                                                                                                       | 0.431   | 0.336   | 0.248   | 0.229   | 0.218   | 0.225   | 0.242   | 0.312   |

## D Additional Commentary on Counting Substructures

We find that the difference in perspective between the selected curvature notions is underscored by their respective performance when counting substructures. *Forman curvature* is an inherently local measure by definition, depending only on 3-cycles between adjacent nodes and their degrees. *Ollivier–Ricci curvature*, when used with a uniform measure, can bound the number of triangles within a locally finite graph [36] through its relation with the Watts–Strogatz clustering coefficient [65]. It can also be shown that quadrangles and pentagons influence the OR curvature, further enhancing the expressivity of this type of curvature [36].

This is the most global perspective one can achieve using  $\kappa_{OR}$  with uniform probability measures, since polygons with more than five edges do not impact the curvature valuation.

However, by changing the probability measure used by  $\kappa_{OR}$ , we can shift the focus towards even larger substructures. For example, the  $n$ th power of the transition matrix provides information on the number of  $n$ -paths and can therefore provide substructure information for cycles of size  $n$  [42]. *Resistance curvature*, by contrast, is biased towards the largest substructures. Due to the ‘global’ nature of the resistance distance metric,  $\kappa_R$  assigns cycles of size  $\geq 5$  a positive curvature. Moreover, in a locally finite graph, one cannot use  $\kappa_R$  to establish a non-trivial bound on the number of triangles (consider creating an infinite cycle between two nodes).

## E Probability Measure for Ollivier–Ricci Curvature and Counting Substructures

The Ollivier–Ricci curvature is of particular interest because of its flexibility. While the predominant probability measure  $\mu$  used by the community is *uniform* for each node, i.e. each of the node’s neighbours is chosen with probability being proportional to the degree of the node. We experimented with different probability measures, one being based on expanding  $\mu$  to the two-hop neighbourhood of a vertex, the other one being based on random walk probabilities. Specifically, for a node  $x$  and a positive integer  $m$ , we calculate  $\mu_{RW}$  as

$$\mu_{RW}(y) := \sum_{k \leq m} \phi_k(x, y), \quad (19)$$

with  $\phi_k(x, y)$  denoting the probability of reaching node  $y$  in a  $k$ -step random walk that starts from node  $x$ . Subsequently, we normalise Eq. (19) to ensure that it is a valid probability distribution. In our experiments, we set  $m = 2$ , meaning that at most 2-step random walks will be considered. As shown in the main paper, this formulation leads to an increase in expressivity, and we expect that further exploration of the probability measures will be a fruitful direction for the future.



We now explore to what extent the ability of the curvature to count substructures can also be improved in this way. To do this, we used powers of the transition matrix as the probability measure, as it has been shown that the  $n$ th power provides information on the number of  $n$ -paths and can therefore provide substructure information for cycles of size  $n$  [42]. We find that powers of the transition matrix larger than 1 can perform better for counting the substructures, particularly for substructures larger than 3-cycles. There is also a difference between Regular and Erdős–Rényi (ER) graphs as the best transition power tends to be higher for ER graphs. We hypothesise that this may have something to do with the mixing time of the graph, as large powers should converge to the stationary distribution, and regular graphs are more ‘expander-like’. The best results are obtained by taking multiple landscapes using the transition matrix powers (up to  $n = 5$ ) and then averaging them. We show that combined with a single layer MLP, this method can perform better than using Graph Neural Network based approaches and OR curvature with the uniform measure.

| Method                                                        | Counting Substructures (MAE ↓) |               |               |               |
|---------------------------------------------------------------|--------------------------------|---------------|---------------|---------------|
|                                                               | Triangle                       | Tailed Tri.   | Star          | 4-Cycle       |
| GCN                                                           | 0.4186                         | 0.3248        | <b>0.1798</b> | 0.2822        |
| $\kappa_{\text{OR}}$ Filtration                               | 0.2321                         | 0.2395        | 0.3393        | 0.3089        |
| $\kappa_{\text{OR}}$ Filtration with transition matrix powers | <b>0.1956</b>                  | <b>0.2095</b> | 0.3212        | <b>0.2680</b> |

| Method          | Optimal Transition Power |         |
|-----------------|--------------------------|---------|
|                 | ER                       | Regular |
| Triangle        | 2                        | 1       |
| Tailed Triangle | 4                        | 3       |
| Star            | 4                        | 2       |
| Chordal Cycle   | 2                        | 2       |
| 4-Cycle         | 8                        | 3       |

## F Computational Complexity

Persistence diagrams of 1-dimensional simplicial complexes, i.e. graphs, can be computed in  $\mathcal{O}(m \log m)$  time where  $m$  denotes the number of edges. Empirically, when calculating different curvature measures for different sizes of graphs, we find that Forman curvature scales well to large graphs, whereas OR and resistance curvatures can be used for smaller graphs and in cases that require a more expressive measure. Note that there are significantly faster ways to calculate resistance curvature as an approximation [64]. A majority of works on GGMs focus on small molecule generation, where any of these curvatures can be used with minimal pre-computation. Table 4 depicts the computational complexity of various curvature calculations on Erdős–Rényi graphs whilst Table 5 and Table 6 compares the complexity to methods based on MMD. We find that calculating persistence diagrams, turning these to persistence landscapes, averaging these and then calculating a distance takes a similar amount of time compared to MMD for different sizes of graphs and for different numbers of graphs in the reference set. Interestingly, our approach scales better than MMD as both the number of graphs in the reference set increases and when the size of the graphs increases. This will be important for comparing distributions of large data sets such as the commonly used Zinc dataset or QM9. Overall, we find that our method can be easily applied in practical use cases, especially given that models for graph generation typically generate graphs with well under 1000 nodes.

Table 4: Computation time in seconds for discrete curvature on varying Erdős–Rényi graph sizes with  $p = 0.3$ .

| No. nodes | $\kappa_{\text{FR}}$ | $\kappa_{\text{OR}}$ | $\kappa_{\text{R}}$ |
|-----------|----------------------|----------------------|---------------------|
| 10        | 0.000                | 0.002                | 0.020               |
| 50        | 0.001                | 0.038                | 0.700               |
| 100       | 0.005                | 0.247                | 6.610               |
| 250       | 0.054                | 4.720                | 252.850             |
| 500       | 0.380                | 59.270               | 6414.970            |
| 1000      | 2.920                | 1040.700             | 74366.070           |



Table 5: Computation time for different number of Erdős–Rényi graphs in reference set ( $n = 10$  and  $p = 0.3$ .) with different distribution distance measures

| Number of Graphs | Degree + MMD |    | Orbit + MMD |    | Curvature + MMD |    | Curvature + Landscapes |    |
|------------------|--------------|----|-------------|----|-----------------|----|------------------------|----|
| 10               | 2.2          | ms | 142.0       | ms | 2.4             | ms | 9.0                    | ms |
| 20               | 3.6          | ms | 217.0       | ms | 4.2             | ms | 12.5                   | ms |
| 50               | 10.9         | ms | 459.0       | ms | 12.4            | ms | 20.9                   | ms |
| 100              | 34.1         | ms | 887.0       | ms | 37.9            | ms | 34.4                   | ms |
| 200              | 120.0        | ms | 1960.0      | ms | 133.0           | ms | 80.4                   | ms |
| 500              | 678.0        | ms | 6740.0      | ms | 727.0           | ms | 144.0                  | ms |
| 1000             | 2620.0       | ms | 19 900.0    | ms | 2680.0          | ms | 359.0                  | ms |

Table 6: Computation time for fixed number of Erdős–Rényi graphs in reference set with different sizes ( $p = 0.3$ .) with different distribution distance measures

| Number of Graphs | Curvature + MMD |    | Curvature + Landscapes |    |
|------------------|-----------------|----|------------------------|----|
| 10               | 2.3             | ms | 9.0                    | ms |
| 20               | 4.5             | ms | 12.5                   | ms |
| 50               | 15.8            | ms | 20.9                   | ms |
| 100              | 93.6            | ms | 34.4                   | ms |
| 200              | 556.0           | ms | 80.4                   | ms |
| 500              | 727.0           | ms | 144.0                  | ms |
| 1000             | 2800.0          | ms | 364.0                  | ms |

## 844 G Ethical Concerns

845 We have proposed a general framework for comparing graph distributions focusing primarily on  
846 method and theoretical development rather than on potential applications. We currently view drug  
847 discovery as being one of the main application areas, where further experiments may be required, but  
848 we have no evidence that our method enhances biases or causes harm in any way.
